# Supplementary material for: Genetic diversity of Xanthoceras sorbifolium bunge germplasm using morphological traits and microsatellite molecular markers
Source: PLoS One. 2017 Jun 1;12(6):e0177577. doi: 10.1371/journal.pone.0177577 (PMC5453433; doi:10.1371/journal.pone.0177577)
Supplement: S1 Table — This is the raw data of morphological traits. (XLSX) [file pone.0177577.s001.xlsx]

## Sheet: Sheet1
	Hundred-grain weight (g)	Transverse diameter (cm)	Longitudinal diameter (cm)	Lateral diameter (cm)	Kernel percentage (%)	Kernel oil content (%)	Saturated fatty acids (%)**	Monounsaturated fatty acids (%)**	Polyunsaturated fatty acids (%)**		Hundred-grain weight (g)	Transverse diameter (cm)	Longitudinal diameter (cm)	Lateral diameter (cm)	Kernel percentage (%)	Kernel oil content (%)	Saturated fatty acids (%)**	Monounsaturated fatty acids (%)**	Polyunsaturated fatty acids (%)**
1					58.58	51.86	7.83	43	49.17	1	111.67	1.24	1.32	1.13	58.6	51.88	7.85	43.02	49.19
1					58.21	51.82	8.43	43.03	48.54	1	111.36	1.43	1.38	1.11	58.14	51.75	8.36	42.96	48.47
1										1	111.58	1.55	1.65	1.19	58.44	51.88	8.17	43.06	48.9
					58.4	51.84	8.13	43.02	48.86		111.54	1.41	1.45	1.14
1										1	111.54±0.16	1.41±0.16	1.45±0.18	1.14±0.04	58.4±0.26	51.84±0.03	8.13±0.42	43.02±0.02	48.86±0.45
1										1	111.54±0.16	1.41±0.16	1.45±0.18	1.14±0.04	58.4±0.26	51.84±0.03	8.13±0.42	43.02±0.02	48.86±0.45
2	108.5	1.28	1.45	1.06	63.59	54.11	8.45	47.57	43.86	2	108.52	1.3	1.47	1.08	63.61	54.13	8.47	47.59	43.88
2	108.2	1.15	1.71	1.09	63.82	54.86	8.42	47.71	43.71	2	108.13	1.08	1.64	1.02	63.75	54.79	8.35	47.64	43.64
											108.39	1.26	1.62	1.12	63.75	54.53	8.47	47.68	43.83
2	108.35	1.22	1.58	1.08	63.71	54.49	8.43	47.64	43.79	2
2										2
2										2	108.35±0.21	1.22±0.09	1.58±0.18	1.08±0.02	63.71±0.16	54.49±0.53	8.43±0.02	47.64±0.1	43.79±0.11
3	86.85	1.02	1.25	0.9	53.43	50.88	7.89	42.11	49.77	3	86.87	1.04	1.27	0.92	53.45	50.9	7.91	42.13	49.79
3	86.92	1.3	1.39	0.97	53.28	51	7.89	42.06	49.83	3	86.85	1.23	1.32	0.9	53.21	50.93	7.82	41.99	49.76
											86.93	1.2	1.36	0.98	53.4	50.98	7.93	42.13	49.84
3	86.89	1.16	1.32	0.94	53.36	50.94	7.89	42.09	49.8	3
3										3
3										3	86.89±0.05	1.16±0.2	1.32±0.1	0.94±0.05	53.36±0.11	50.94±0.08	7.89±0	42.09±0.04	49.8±0.04
4	89.65	1.36	1.61	1.06	56.44	52.7	7.99	42.37	49.46	4	89.67	1.38	1.63	1.08	56.46	52.72	8.01	42.39	49.48
4	89.47	1.42	1.5	1.02	56.1	52.49	7.92	42.05	49.88	4	89.4	1.35	1.43	0.95	56.03	52.42	7.85	41.98	49.81
											89.6	1.43	1.6	1.08	56.31	52.64	8	42.25	49.71
4	89.56	1.39	1.56	1.04	56.27	52.6	7.96	42.21	49.67	4
4										4
4										4	89.56±0.13	1.39±0.04	1.56±0.08	1.04±0.03	56.27±0.24	52.6±0.15	7.96±0.05	42.21±0.23	49.67±0.3
5	79.7	1.35	1.22	0.95	62.74	53.9	8.08	42.63	49.07	5	79.72	1.37	1.24	0.97	62.76	53.92	8.1	42.65	49.09
5	79.58	1.29	1.6	1.01	61.49	53.02	8.04	42.73	49.02	5	79.51	1.22	1.53	0.94	61.42	52.95	7.97	42.66	48.95
											79.68	1.36	1.45	1.02	62.16	53.5	8.1	42.72	49.09
5	79.64	1.32	1.41	0.98	62.12	53.46	8.06	42.68	49.05	5
5										5
5										5	79.64±0.08	1.32±0.04	1.41±0.27	0.98±0.04	62.12±0.88	53.46±0.62	8.06±0.03	42.68±0.07	49.05±0.04
6	88.55	1.36	1.57	1.28	56.92	49.03	8.22	42.37	49.21	6	88.57	1.38	1.59	1.3	56.94	49.05	8.24	42.39	49.23
6	88.27	1.4	1.44	1.12	56.28	49.16	8.29	42.31	49.21	6	88.2	1.33	1.37	1.05	56.21	49.09	8.22	42.24	49.14
											88.45	1.42	1.55	1.24	56.64	49.14	8.29	42.38	49.25
6	88.41	1.38	1.51	1.2	56.6	49.1	8.25	42.34	49.21	6
6										6
6										6	88.41±0.2	1.38±0.03	1.51±0.09	1.2±0.11	56.6±0.45	49.1±0.09	8.25±0.04	42.34±0.04	49.21±0
7	113.9	1.28	1.6	1.08	53.03	57.87	8.65	45.57	45.66	7	113.92	1.3	1.62	1.1	53.05	57.89	8.67	45.59	45.68
7	113.28	1.5	1.66	1.15	53.48	57.39	8.6	45.74	45.57	7	113.21	1.43	1.59	1.08	53.41	57.32	8.53	45.67	45.5
											113.63	1.43	1.67	1.16	53.3	57.67	8.66	45.7	45.66
7	113.59	1.39	1.63	1.12	53.26	57.63	8.62	45.66	45.62	7
7										7
7										7	113.59±0.44	1.39±0.16	1.63±0.04	1.12±0.05	53.26±0.32	57.63±0.34	8.62±0.03	45.66±0.12	45.62±0.06
8	71.9	1.15	1.2	1	56.47	51.82	7.85	41.86	50.11	8	71.92	1.17	1.22	1.02	56.49	51.84	7.87	41.88	50.13
8	72.38	1.32	1.38	1.24	56.11	51.9	7.8	41.58	50.47	8	72.31	1.25	1.31	1.17	56.04	51.83	7.73	41.51	50.4
											72.18	1.28	1.33	1.16	56.33	51.9	7.87	41.76	50.33
8	72.14	1.24	1.29	1.12	56.29	51.86	7.83	41.72	50.29	8
8										8
8										8	72.14±0.34	1.24±0.12	1.29±0.13	1.12±0.17	56.29±0.25	51.86±0.06	7.83±0.04	41.72±0.2	50.29±0.25
9	102.5	1.38	1.45	0.88	51.12	50.58	8.55	44.03	47.3	9	102.52	1.4	1.47	0.9	51.14	50.6	8.57	44.05	47.32
9	102.48	1.24	1.3	1.06	51.75	50.9	8.6	43.93	47.33	9	102.41	1.17	1.23	0.99	51.68	50.83	8.53	43.86	47.26
											102.53	1.35	1.42	1.01	51.48	50.78	8.61	44.02	47.36
9	102.49	1.31	1.38	0.97	51.44	50.74	8.57	43.98	47.32	9
9										9
9										9	102.49±0.01	1.31±0.1	1.38±0.11	0.97±0.13	51.44±0.45	50.74±0.23	8.57±0.04	43.98±0.07	47.32±0.02
10	66.45	1.24	1.34	0.83	53.88	55.09	7.46	41.84	50.61	10	66.47	1.26	1.36	0.85	53.9	55.11	7.48	41.86	50.63
10	66.3	1.2	1.42	0.92	53.2	55.37	7.42	41.78	50.71	10	66.23	1.13	1.35	0.85	53.13	55.3	7.35	41.71	50.64
											66.42	1.26	1.42	0.92	53.58	55.27	7.48	41.85	50.7
10	66.38	1.22	1.38	0.88	53.54	55.23	7.44	41.81	50.66	10
10										10
10										10	66.38±0.11	1.22±0.03	1.38±0.06	0.88±0.06	53.54±0.48	55.23±0.2	7.44±0.03	41.81±0.04	50.66±0.07
11	50.9	0.91	1.04	0.71	47.54	57.97	8.59	43.02	48.23	11	50.92	0.93	1.06	0.73	47.56	57.99	8.61	43.04	48.25
11	50.47	1.05	1.11	0.9	47.9	57.14	8.65	42.77	48.51	11	50.4	0.98	1.04	0.83	47.83	57.07	8.58	42.7	48.44
											50.73	1.02	1.12	0.85	47.76	57.6	8.66	42.94	48.41
11	50.69	0.98	1.08	0.81	47.72	57.56	8.62	42.9	48.37	11
11										11
11										11	50.69±0.3	0.98±0.1	1.08±0.05	0.81±0.13	47.72±0.25	57.56±0.59	8.62±0.04	42.9±0.18	48.37±0.2
12	72.1	1.14	1.26	0.99	50.49	56.82	8.57	47.7	43.64	12	72.12	1.16	1.28	1.01	50.51	56.84	8.59	47.72	43.66
12	72.39	1.35	1.22	1.08	50.31	56.94	8.65	47.73	43.53	12	72.32	1.28	1.15	1.01	50.24	56.87	8.58	47.66	43.46
											72.29	1.29	1.28	1.08	50.44	56.92	8.65	47.76	43.63
12	72.25	1.25	1.24	1.04	50.4	56.88	8.61	47.72	43.59	12
12										12
12										12	72.25±0.21	1.25±0.15	1.24±0.03	1.04±0.06	50.4±0.13	56.88±0.08	8.61±0.06	47.72±0.02	43.59±0.08
13	78.2	1.09	1.14	0.97	52.69	53.67	8.31	42.68	48.87	13	78.22	1.11	1.16	0.99	52.71	53.69	8.33	42.7	48.89
13	78.53	1.17	1.25	1.02	52.33	53.52	8.31	42.52	49.03	13	78.46	1.1	1.18	0.95	52.26	53.45	8.24	42.45	48.96
											78.41	1.17	1.24	1.04	52.55	53.64	8.35	42.64	48.99
13	78.37	1.13	1.2	1	52.51	53.6	8.31	42.6	48.95	13
13										13
13										13	78.37±0.23	1.13±0.06	1.2±0.08	1±0.04	52.51±0.25	53.6±0.11	8.31±0	42.6±0.11	48.95±0.11
14	96.15	1.14	1.18	1.02	52.68	57.9	8.59	44.14	47.01	14	96.17	1.16	1.2	1.04	52.7	57.92	8.61	44.16	47.03
14	96.58	1.38	1.55	1.13	53.15	57.54	8.55	44.14	47.06	14	96.51	1.31	1.48	1.06	53.08	57.47	8.48	44.07	46.99
											96.41	1.3	1.41	1.12	52.96	57.76	8.61	44.18	47.08
14	96.37	1.26	1.37	1.08	52.92	57.72	8.57	44.14	47.04	14
14										14
14										14	96.37±0.3	1.26±0.17	1.37±0.26	1.08±0.08	52.92±0.33	57.72±0.25	8.57±0.03	44.14±0	47.04±0.04
15	95.2	1.27	1.27	1.05	47.9	51.83	8.29	45.26	46.45	15	95.22	1.29	1.29	1.07	47.92	51.85	8.31	45.28	46.47
15	95.28	1.34	1.51	1.23	47.38	51.18	8.64	45.26	46.1	15	95.21	1.27	1.44	1.16	47.31	51.11	8.57	45.19	46.03
											95.28	1.35	1.43	1.18	47.68	51.55	8.51	45.3	46.32
15	95.24	1.31	1.39	1.14	47.64	51.51	8.47	45.26	46.28	15
15										15
15										15	95.24±0.06	1.31±0.05	1.39±0.17	1.14±0.13	47.64±0.37	51.51±0.46	8.47±0.25	45.26±0	46.28±0.25
16	84.7	1.09	1.4	0.9	56.67	57.49	7.91	42.93	49.08	16	84.72	1.11	1.42	0.92	56.69	57.51	7.93	42.95	49.1
16	84.9	1.37	1.39	1.02	56.21	57.11	7.86	43.11	48.9	16	84.83	1.3	1.32	0.95	56.14	57.04	7.79	43.04	48.83
											84.84	1.27	1.44	1	56.48	57.34	7.93	43.06	49.03
16	84.8	1.23	1.4	0.96	56.44	57.3	7.89	43.02	48.99	16
16										16
16										16	84.8±0.14	1.23±0.2	1.4±0.01	0.96±0.08	56.44±0.33	57.3±0.27	7.89±0.04	43.02±0.13	48.99±0.13
17	89.35	1.31	1.51	1.05	56.82	59.62	8.49	47.53	43.98	17	89.37	1.33	1.53	1.07	56.84	59.64	8.51	47.55	44
17	89.87	1.42	1.44	1.11	56.89	59.24	9.24	47.39	43.37	17	89.8	1.35	1.37	1.04	56.82	59.17	9.17	47.32	43.3
											89.65	1.41	1.52	1.12	56.9	59.47	8.91	47.5	43.72
17	89.61	1.37	1.48	1.08	56.86	59.43	8.87	47.46	43.68	17
17										17
17										17	89.61±0.37	1.37±0.08	1.48±0.05	1.08±0.04	56.86±0.05	59.43±0.27	8.87±0.53	47.46±0.1	43.68±0.43
18	101.85	1.33	1.56	1.06	56.16	59.02	8.56	46.58	44.73	18	101.87	1.35	1.58	1.08	56.18	59.04	8.58	46.6	44.75
18	101.56	1.46	1.52	1.11	56.26	59.35	8.45	46.76	44.67	18	101.49	1.39	1.45	1.04	56.19	59.28	8.38	46.69	44.6
											101.75	1.44	1.58	1.13	56.25	59.23	8.54	46.71	44.74
18	101.71	1.4	1.54	1.09	56.21	59.19	8.5	46.67	44.7	18
18										18
18										18	101.71±0.21	1.4±0.09	1.54±0.03	1.09±0.04	56.21±0.07	59.19±0.23	8.5±0.08	46.67±0.13	44.7±0.04
19	90.7	1.27	1.35	0.77	54.24	52.66	8.28	42.9	48.74	19	90.72	1.29	1.37	0.79	54.26	52.68	8.3	42.92	48.76
19	90.27	1.25	1.49	0.96	54.19	52.74	8.22	42.65	48.97	19	90.2	1.18	1.42	0.89	54.12	52.67	8.15	42.58	48.9
											90.53	1.3	1.46	0.91	54.26	52.74	8.29	42.82	48.9
19	90.49	1.26	1.42	0.87	54.22	52.7	8.25	42.78	48.86	19
19										19
19										19	90.49±0.3	1.26±0.01	1.42±0.1	0.87±0.13	54.22±0.04	52.7±0.06	8.25±0.04	42.78±0.18	48.86±0.16
20	70.1	1.04	1.2	0.83	51.98	56.6	7.76	42.08	49.97	20	70.12	1.06	1.22	0.85	52	56.62	7.78	42.1	49.99
20	70.45	1.22	1.25	1.05	51.62	56.84	7.81	42.13	49.87	20	70.38	1.15	1.18	0.98	51.55	56.77	7.74	42.06	49.8
											70.32	1.17	1.27	0.98	51.84	56.76	7.83	42.15	49.96
20	70.28	1.13	1.23	0.94	51.8	56.72	7.79	42.11	49.92	20
20										20
20										20	70.28±0.25	1.13±0.13	1.23±0.04	0.94±0.16	51.8±0.25	56.72±0.17	7.79±0.03	42.11±0.04	49.92±0.07
21	77.05	0.91	1.05	0.9	60.75	50.29	7.91	43.61	48.26	21	77.07	0.93	1.07	0.92	60.77	50.31	7.93	43.63	48.28
21	77.23	1.32	1.5	0.93	61.28	50.52	7.93	43.41	48.49	21	77.16	1.25	1.43	0.86	61.21	50.45	7.86	43.34	48.42
											77.18	1.16	1.32	0.96	61.06	50.45	7.96	43.55	48.42
21	77.14	1.12	1.28	0.92	61.02	50.41	7.92	43.51	48.38	21
21										21
21										21	77.14±0.13	1.12±0.29	1.28±0.32	0.92±0.02	61.02±0.37	50.41±0.16	7.92±0.01	43.51±0.14	48.38±0.16
22	107.2	1.3	1.56	1.09	52.68	53.71	7.86	41.54	50.34	22	107.22	1.32	1.58	1.11	52.7	53.73	7.88	41.56	50.36
22	107.3	1.49	1.62	1.05	51.79	53.63	7.88	41.35	50.5	22	107.23	1.42	1.55	0.98	51.72	53.56	7.81	41.28	50.43
											107.29	1.44	1.63	1.11	52.28	53.71	7.91	41.49	50.46
22	107.25	1.4	1.59	1.07	52.24	53.67	7.87	41.45	50.42	22
22										22
22										22	107.25±0.07	1.4±0.13	1.59±0.04	1.07±0.03	52.24±0.63	53.67±0.06	7.87±0.01	41.45±0.13	50.42±0.11
23	82.85	1.17	1.4	0.92	58.22	50.78	8	43.32	48.68	23	82.87	1.19	1.42	0.94	58.24	50.8	8.02	43.34	48.7
23	82.56	1.36	1.25	0.98	57.29	50.65	8.45	43.02	48.52	23	82.49	1.29	1.18	0.91	57.22	50.58	8.38	42.95	48.45
											82.75	1.31	1.37	0.99	57.8	50.76	8.27	43.21	48.64
23	82.71	1.27	1.33	0.95	57.76	50.72	8.23	43.17	48.6	23
23										23
23										23	82.71±0.21	1.27±0.13	1.33±0.11	0.95±0.04	57.76±0.66	50.72±0.09	8.23±0.32	43.17±0.21	48.6±0.11
24	85.9	1.21	1.29	1.14	50.06	54.74	8.09	47.44	43.34	24	85.92	1.23	1.31	1.16	50.08	54.76	8.11	47.46	43.36
24	85.28	1.55	1.3	1.17	50.4	54.34	8.77	47.39	43.68	24	85.21	1.48	1.23	1.1	50.33	54.27	8.7	47.32	43.61
											85.63	1.42	1.34	1.2	50.27	54.58	8.47	47.46	43.55
24	85.59	1.38	1.3	1.16	50.23	54.54	8.43	47.42	43.51	24
24										24
24										24	85.59±0.44	1.38±0.24	1.3±0.01	1.16±0.02	50.23±0.24	54.54±0.28	8.43±0.48	47.42±0.04	43.51±0.24
25	89.5	1.09	1.19	0.9	48.04	61.21	8.23	44.87	46.78	25	89.52	1.11	1.21	0.92	48.06	61.23	8.25	44.89	46.8
25	89.37	1.39	1.47	1.1	49.27	61.18	8.58	45.22	45.93	25	89.3	1.32	1.4	1.03	49.2	61.11	8.51	45.15	45.86
											89.48	1.28	1.37	1.04	48.7	61.24	8.44	45.09	46.4
25	89.44	1.24	1.33	1	48.66	61.2	8.4	45.05	46.36	25
25										25
25										25	89.44±0.09	1.24±0.21	1.33±0.2	1±0.14	48.66±0.87	61.2±0.02	8.4±0.25	45.05±0.25	46.36±0.6
26	80	1.08	1.25	1	46.75	57.55	8.17	43.51	48.21	26	80.02	1.1	1.27	1.02	46.77	57.57	8.19	43.53	48.23
26	80.47	1.2	1.37	1.14	46.08	57.51	8.17	43.5	48.22	26	80.4	1.13	1.3	1.07	46.01	57.44	8.1	43.43	48.15
											80.28	1.18	1.35	1.11	46.46	57.57	8.21	43.55	48.26
26	80.24	1.14	1.31	1.07	46.42	57.53	8.17	43.51	48.22	26
26										26
26										26	80.24±0.33	1.14±0.08	1.31±0.08	1.07±0.1	46.42±0.47	57.53±0.03	8.17±0	43.51±0.01	48.22±0.01
27	93.45	1.15	1.46	0.82	53.29	52.26	8.09	42.13	49.6	27	93.47	1.17	1.48	0.84	53.31	52.28	8.11	42.15	49.62
27	93.29	1.23	1.5	1.14	53.82	52.37	8.14	42.18	49.51	27	93.22	1.16	1.43	1.07	53.75	52.3	8.07	42.11	49.44
											93.41	1.23	1.52	1.02	53.6	52.36	8.16	42.2	49.6
27	93.37	1.19	1.48	0.98	53.56	52.32	8.12	42.16	49.56	27
27										27
27										27	93.37±0.11	1.19±0.06	1.48±0.03	0.98±0.23	53.56±0.37	52.32±0.08	8.12±0.03	42.16±0.04	49.56±0.06
28	97.1	1.41	1.44	1.07	51.49	49.48	8.27	43.5	48.14	28	97.12	1.43	1.46	1.09	51.51	49.5	8.29	43.52	48.16
28	97.81	1.32	1.55	1.13	51.02	49.11	8.2	43.53	48.14	28	97.74	1.25	1.48	1.06	50.95	49.04	8.13	43.46	48.07
											97.5	1.41	1.54	1.14	51.3	49.34	8.27	43.56	48.18
28	97.46	1.37	1.5	1.1	51.26	49.3	8.23	43.52	48.14	28
28										28
28										28	97.46±0.5	1.37±0.06	1.5±0.08	1.1±0.04	51.26±0.33	49.3±0.26	8.23±0.05	43.52±0.02	48.14±0
29	113.6	1.49	1.25	1.21	56.69	55.09	8.64	43.19	48.09	29	113.62	1.51	1.27	1.23	56.71	55.11	8.66	43.21	48.11
29	113.48	1.33	1.46	1.35	56.2	55.66	8.63	43.2	48.05	29	113.41	1.26	1.39	1.28	56.13	55.59	8.56	43.13	47.98
											113.58	1.45	1.4	1.32	56.49	55.42	8.67	43.24	48.11
29	113.54	1.41	1.36	1.28	56.45	55.38	8.63	43.2	48.07	29
29										29
29										29	113.54±0.08	1.41±0.11	1.36±0.15	1.28±0.1	56.45±0.35	55.38±0.4	8.63±0.01	43.2±0.01	48.07±0.03
30	73.25	1.16	1.47	1.1	57.61	54.28	8.23	43.12	48.4	30	73.27	1.18	1.49	1.12	57.63	54.3	8.25	43.14	48.42
30	73.28	1.24	1.37	1.14	57.12	54.33	8.51	43.82	47.42	30	73.21	1.17	1.3	1.07	57.05	54.26	8.44	43.75	47.35
											73.31	1.24	1.46	1.16	57.41	54.35	8.41	43.51	47.95
30	73.27	1.2	1.42	1.12	57.37	54.31	8.37	43.47	47.91	30
30										30
30										30	73.27±0.02	1.2±0.06	1.42±0.07	1.12±0.03	57.37±0.35	54.31±0.04	8.37±0.2	43.47±0.49	47.91±0.69
31	74.75	1.27	1.18	0.69	57.26	53.01	8.13	42.51	49.24	31	74.77	1.29	1.2	0.71	57.28	53.03	8.15	42.53	49.26
31	74.02	1.24	1.44	1.05	57.32	53.01	8.12	42.44	49.28	31	73.95	1.17	1.37	0.98	57.25	52.94	8.05	42.37	49.21
											74.43	1.3	1.35	0.91	57.33	53.05	8.16	42.52	49.3
31	74.39	1.26	1.31	0.87	57.29	53.01	8.12	42.48	49.26	31
31										31
31										31	74.39±0.52	1.26±0.02	1.31±0.18	0.87±0.25	57.29±0.04	53.01±0	8.12±0.01	42.48±0.05	49.26±0.03
32	89.85	1.15	1.32	1.06	51.86	65.48	8.5	45.6	45.8	32	89.87	1.17	1.34	1.08	51.88	65.5	8.52	45.62	45.82
32	89.47	1.29	1.35	1.1	51.44	65.01	8.5	45.55	45.79	32	89.4	1.22	1.28	1.03	51.37	64.94	8.43	45.48	45.72
											89.7	1.26	1.38	1.12	51.69	65.29	8.54	45.62	45.84
32	89.66	1.22	1.34	1.08	51.65	65.25	8.5	45.58	45.8	32
32										32
32										32	89.66±0.27	1.22±0.1	1.34±0.02	1.08±0.03	51.65±0.3	65.25±0.33	8.5±0	45.58±0.04	45.8±0.01
33	88.9	1.35	1.4	0.91	54.44	52.76	9.02	44.67	46.17	33	88.92	1.37	1.42	0.93	54.46	52.78	9.04	44.69	46.19
33	88.4	1.27	1.37	1.2	55.22	52.12	9.1	44.66	46.07	33	88.33	1.2	1.3	1.13	55.15	52.05	9.03	44.59	46
											88.69	1.35	1.43	1.1	54.87	52.48	9.1	44.71	46.16
33	88.65	1.31	1.39	1.06	54.83	52.44	9.06	44.67	46.12	33
33										33
33										33	88.65±0.35	1.31±0.06	1.39±0.02	1.06±0.21	54.83±0.55	52.44±0.45	9.06±0.06	44.67±0.01	46.12±0.07
34	91.05	1.3	1.56	1.23	62.63	55.66	8.36	44.23	47.14	34	91.07	1.32	1.58	1.25	62.65	55.68	8.38	44.25	47.16
34	91.45	1.18	1.49	1.22	63.02	55.49	8.41	44.37	46.95	34	91.38	1.11	1.42	1.15	62.95	55.42	8.34	44.3	46.88
											91.29	1.28	1.57	1.27	62.87	55.62	8.43	44.34	47.09
34	91.25	1.24	1.53	1.23	62.83	55.58	8.39	44.3	47.05	34
34										34
34										34	91.25±0.28	1.24±0.08	1.53±0.05	1.23±0.01	62.83±0.28	55.58±0.12	8.39±0.03	44.3±0.1	47.05±0.13
35	116.85	1.5	1.58	1.4	51.18	53.89	8.73	45.3	45.82	35	116.87	1.52	1.6	1.42	51.2	53.91	8.75	45.32	45.84
35	116.37	1.56	1.6	1.35	51.57	53.26	8.62	45.3	45.92	35	116.3	1.49	1.53	1.28	51.5	53.19	8.55	45.23	45.85
											116.65	1.57	1.63	1.42	51.42	53.62	8.72	45.34	45.91
35	116.61	1.53	1.59	1.38	51.38	53.58	8.68	45.3	45.87	35
35										35
35										35	116.61±0.34	1.53±0.04	1.59±0.01	1.38±0.04	51.38±0.28	53.58±0.45	8.68±0.07	45.3±0	45.87±0.07
36	87.85	1.08	1.3	0.97	51.86	59.09	8.13	44.62	47.15	36	87.87	1.1	1.32	0.99	51.88	59.11	8.15	44.64	47.17
36	87.37	1.27	1.38	1.07	50.04	59.95	7.99	44.17	47.68	36	87.3	1.2	1.31	1	49.97	59.88	7.92	44.1	47.61
											87.65	1.22	1.38	1.06	50.99	59.56	8.1	44.44	47.46
36	87.61	1.18	1.34	1.02	50.95	59.52	8.06	44.4	47.42	36
36										36
36										36	87.61±0.34	1.18±0.13	1.34±0.06	1.02±0.07	50.95±1.29	59.52±0.61	8.06±0.1	44.4±0.32	47.42±0.37
37	99.05	1.22	1.28	1.02	60.79	57.42	8.96	44.18	46.69	37	99.07	1.24	1.3	1.04	60.81	57.44	8.98	44.2	46.71
37	99.04	1.48	1.42	1.27	60.1	57.58	8.91	44.22	46.7	37	98.97	1.41	1.35	1.2	60.03	57.51	8.84	44.15	46.63
											99.09	1.39	1.39	1.19	60.49	57.54	8.97	44.24	46.74
37	99.05	1.35	1.35	1.15	60.45	57.5	8.93	44.2	46.7	37
37										37
37										37	99.05±0.01	1.35±0.18	1.35±0.1	1.15±0.18	60.45±0.49	57.5±0.11	8.93±0.03	44.2±0.03	46.7±0.01
38	66.4	1.16	1.4	1.03	56.02	54.66	8.4	40.66	50.81	38	66.42	1.18	1.42	1.05	56.04	54.68	8.42	40.68	50.83
38	66.92	1.28	1.33	1.09	56.97	54.68	8.4	40.65	50.79	38	66.85	1.21	1.26	1.02	56.9	54.61	8.33	40.58	50.72
											66.7	1.26	1.41	1.1	56.54	54.71	8.44	40.7	50.84
38	66.66	1.22	1.37	1.06	56.5	54.67	8.4	40.66	50.8	38
38										38
38										38	66.66±0.37	1.22±0.08	1.37±0.05	1.06±0.04	56.5±0.67	54.67±0.01	8.4±0	40.66±0.01	50.8±0.01
39	117.4	1.5	1.53	1.24	56.73	58.43	8.76	45.47	45.52	39	117.42	1.52	1.55	1.26	56.75	58.45	8.78	45.49	45.54
39	117.37	1.41	1.46	1.18	56.92	58.52	8.23	45.22	46.32	39	117.3	1.34	1.39	1.11	56.85	58.45	8.16	45.15	46.25
											117.43	1.5	1.54	1.25	56.87	58.52	8.53	45.39	45.96
39	117.39	1.46	1.5	1.21	56.83	58.48	8.49	45.35	45.92	39
39										39
39										39	117.39±0.02	1.46±0.06	1.5±0.05	1.21±0.04	56.83±0.13	58.48±0.06	8.49±0.38	45.35±0.18	45.92±0.57
40	109.45	1.3	1.55	1.17	48.24	47.32	9.52	45.12	45.16	40	109.47	1.32	1.57	1.19	48.26	47.34	9.54	45.14	45.18
40	109.28	1.45	1.38	1.09	48.79	47.21	9.55	45.32	44.91	40	109.21	1.38	1.31	1.02	48.72	47.14	9.48	45.25	44.84
											109.41	1.42	1.51	1.17	48.56	47.31	9.58	45.26	45.08
40	109.37	1.38	1.47	1.13	48.52	47.27	9.54	45.22	45.04	40
40										40
40										40	109.37±0.12	1.38±0.11	1.47±0.12	1.13±0.06	48.52±0.39	47.27±0.08	9.54±0.03	45.22±0.14	45.04±0.18
41	93.95	1.2	1.24	1.04	58.14	54.73	8.31	42.26	49.16	41	93.97	1.22	1.26	1.06	58.16	54.75	8.33	42.28	49.18
41	93.96	1.35	1.14	1.06	58.39	54.08	8.27	42.3	49.17	41	93.89	1.28	1.07	0.99	58.32	54.01	8.2	42.23	49.1
											94	1.32	1.23	1.09	58.31	54.45	8.33	42.32	49.21
41	93.96	1.28	1.19	1.05	58.27	54.41	8.29	42.28	49.17	41
41										41
41										41	93.96±0.01	1.28±0.11	1.19±0.07	1.05±0.01	58.27±0.18	54.41±0.46	8.29±0.03	42.28±0.03	49.17±0.01
42	80.9	1.14	1.56	1.02	50.19	56.5	7.64	42.73	49.44	42	80.92	1.16	1.58	1.04	50.21	56.52	7.66	42.75	49.46
42	80.39	1.3	1.29	1.18	50.47	56.52	7.58	42.79	49.42	42	80.32	1.23	1.22	1.11	50.4	56.45	7.51	42.72	49.35
											80.69	1.26	1.47	1.14	50.37	56.55	7.65	42.8	49.47
42	80.65	1.22	1.43	1.1	50.33	56.51	7.61	42.76	49.43	42
42										42
42										42	80.65±0.36	1.22±0.11	1.43±0.19	1.1±0.11	50.33±0.2	56.51±0.01	7.61±0.05	42.76±0.04	49.43±0.01
43	92.25	1.37	1.44	1.09	54.42	51.62	7.67	43.81	48.24	43	92.27	1.39	1.46	1.11	54.44	51.64	7.69	43.83	48.26
43	92.3	1.24	1.35	0.92	54.19	51.44	7.62	43.66	48.43	43	92.23	1.17	1.28	0.85	54.12	51.37	7.55	43.59	48.36
											92.32	1.35	1.44	1.05	54.35	51.57	7.68	43.78	48.38
43	92.28	1.31	1.4	1.01	54.31	51.53	7.64	43.74	48.34	43
43										43
43										43	92.28±0.04	1.31±0.09	1.4±0.06	1.01±0.12	54.31±0.16	51.53±0.13	7.64±0.03	43.74±0.11	48.34±0.13
44	77.5	1.24	1.45	0.99	62.45	49.85	8.35	40.75	50.75	44	77.52	1.26	1.47	1.01	62.47	49.87	8.37	40.77	50.77
44	77.2	1.22	1.57	1.04	62.03	50	8.3	40.53	50.99	44	77.13	1.15	1.5	0.97	61.96	49.93	8.23	40.46	50.92
											77.39	1.27	1.55	1.06	62.28	49.97	8.37	40.68	50.91
44	77.35	1.23	1.51	1.02	62.24	49.93	8.33	40.64	50.87	44
44										44
44										44	77.35±0.21	1.23±0.01	1.51±0.08	1.02±0.04	62.24±0.3	49.93±0.11	8.33±0.03	40.64±0.16	50.87±0.17
45	77.6	1.07	1.41	0.85	46.06	47.42	8.21	44.04	47.66	45	77.62	1.09	1.43	0.87	46.08	47.44	8.23	44.06	47.68
45	77.38	1.24	1.64	1.17	46.92	47.3	8.25	44.08	47.58	45	77.31	1.17	1.57	1.1	46.85	47.23	8.18	44.01	47.51
											77.53	1.2	1.57	1.05	46.53	47.4	8.27	44.1	47.66
45	77.49	1.16	1.53	1.01	46.49	47.36	8.23	44.06	47.62	45
45										45
45										45	77.49±0.16	1.16±0.12	1.53±0.16	1.01±0.23	46.49±0.61	47.36±0.08	8.23±0.03	44.06±0.03	47.62±0.06
46	91.1	1.39	1.5	1.18	52.03	51.87	8.1	42.86	48.86	46	91.12	1.41	1.52	1.2	52.05	51.89	8.12	42.88	48.88
46	91.58	1.31	1.42	1.09	52.94	51.58	8.48	42.84	48.54	46	91.51	1.24	1.35	1.02	52.87	51.51	8.41	42.77	48.47
											91.38	1.39	1.5	1.18	52.53	51.77	8.33	42.89	48.74
46	91.34	1.35	1.46	1.14	52.49	51.73	8.29	42.85	48.7	46
46										46
46										46	91.34±0.34	1.35±0.06	1.46±0.06	1.14±0.06	52.49±0.64	51.73±0.21	8.29±0.27	42.85±0.01	48.7±0.23
47	73.9	1.1	1.42	1.07	68.2	50.73	8.11	43.25	48.51	47	73.92	1.12	1.44	1.09	68.22	50.75	8.13	43.27	48.53
47	73.39	1.28	1.35	1.01	67.38	50.89	8.16	43.12	48.6	47	73.32	1.21	1.28	0.94	67.31	50.82	8.09	43.05	48.53
											73.69	1.23	1.43	1.08	67.83	50.85	8.17	43.23	48.6
47	73.65	1.19	1.39	1.04	67.79	50.81	8.13	43.19	48.56	47
47										47
47										47	73.65±0.36	1.19±0.13	1.39±0.05	1.04±0.04	67.79±0.58	50.81±0.11	8.13±0.04	43.19±0.09	48.56±0.06
48	107.45	1.37	1.44	1.14	56.77	55.61	8.81	47.62	43.41	48	107.47	1.39	1.46	1.16	56.79	55.63	8.83	47.64	43.43
48	107.52	1.41	1.34	1.17	56.25	55.67	8.03	47.32	44.46	48	107.45	1.34	1.27	1.1	56.18	55.6	7.96	47.25	44.39
											107.53	1.43	1.43	1.2	56.55	55.68	8.46	47.51	43.98
48	107.49	1.39	1.39	1.16	56.51	55.64	8.42	47.47	43.94	48
48										48
48										48	107.49±0.05	1.39±0.03	1.39±0.07	1.16±0.02	56.51±0.37	55.64±0.04	8.42±0.55	47.47±0.21	43.94±0.74
49	99.9	1.48	1.55	1.29	67.67	55.31	8.47	46.37	45.01	49	99.92	1.5	1.57	1.31	67.69	55.33	8.49	46.39	45.03
49	99.27	1.29	1.47	1.17	66.88	55.92	8.6	46.58	44.69	49	99.2	1.22	1.4	1.1	66.81	55.85	8.53	46.51	44.62
											99.63	1.43	1.55	1.27	67.32	55.66	8.57	46.52	44.89
49	99.59	1.39	1.51	1.23	67.28	55.62	8.53	46.48	44.85	49
49										49
49										49	99.59±0.45	1.39±0.13	1.51±0.06	1.23±0.08	67.28±0.56	55.62±0.43	8.53±0.09	46.48±0.15	44.85±0.23
50	79.25	1.07	1.31	1.03	47.35	48.34	8.19	45.38	46.22	50	79.27	1.09	1.33	1.05	47.37	48.36	8.21	45.4	46.24
50	79.57	1.29	1.32	1.05	47.89	48.82	8.19	45.41	46.2	50	79.5	1.22	1.25	0.98	47.82	48.75	8.12	45.34	46.13
											79.45	1.22	1.36	1.08	47.66	48.62	8.23	45.44	46.25
50	79.41	1.18	1.32	1.04	47.62	48.58	8.19	45.4	46.21	50
50										50
50										50	79.41±0.23	1.18±0.16	1.32±0.01	1.04±0.01	47.62±0.38	48.58±0.34	8.19±0.01	45.4±0.02	46.21±0.01
51	80.45	1.18	1.35	0.93	65.63	53.43	8.54	46.68	44.62	51	80.47	1.2	1.37	0.95	65.65	53.45	8.56	46.7	44.64
51	80.98	1.51	1.5	1.03	65.22	53.15	9.44	46.94	43.62	51	80.91	1.44	1.43	0.96	65.15	53.08	9.37	46.87	43.55
											80.76	1.39	1.47	1.02	65.47	53.33	9.03	46.85	44.16
51	80.72	1.35	1.43	0.98	65.43	53.29	8.99	46.81	44.12	51
51										51
51										51	80.72±0.37	1.35±0.23	1.43±0.11	0.98±0.07	65.43±0.29	53.29±0.2	8.99±0.64	46.81±0.18	44.12±0.71
52	88.65	1.3	1.38	0.93	47.96	49.26	7.97	42.37	49.49	52	88.67	1.32	1.4	0.95	47.98	49.28	7.99	42.39	49.51
52	88.43	1.5	1.4	1.16	47.23	49.81	7.93	42.33	49.59	52	88.36	1.43	1.33	1.09	47.16	49.74	7.86	42.26	49.52
											88.58	1.44	1.43	1.09	47.64	49.58	7.99	42.39	49.58
52	88.54	1.4	1.39	1.05	47.6	49.54	7.95	42.35	49.54	52
52										52
52										52	88.54±0.16	1.4±0.14	1.39±0.01	1.05±0.16	47.6±0.52	49.54±0.39	7.95±0.03	42.35±0.03	49.54±0.07
53	116.45	1.25	1.7	1.02	51.8	52.54	8.17	42.29	49.4	53	116.47	1.27	1.72	1.04	51.82	52.56	8.19	42.31	49.42
53	116.03	1.47	1.61	1.24	51.48	52.82	8.09	42.32	49.42	53	115.96	1.4	1.54	1.17	51.41	52.75	8.02	42.25	49.35
											116.28	1.4	1.7	1.17	51.68	52.72	8.17	42.35	49.45
53	116.24	1.36	1.66	1.13	51.64	52.68	8.13	42.31	49.41	53
53										53
53										53	116.24±0.3	1.36±0.16	1.66±0.06	1.13±0.16	51.64±0.23	52.68±0.2	8.13±0.06	42.31±0.02	49.41±0.01
54	78.5	1.12	1.32	0.88	42.04	48.96	8.07	41.78	49.99	54	78.52	1.14	1.34	0.9	42.06	48.98	8.09	41.8	50.01
54	78.36	1.38	1.29	1.04	42.37	48.01	8.1	41.75	49.99	54	78.29	1.31	1.22	0.97	42.3	47.94	8.03	41.68	49.92
											78.47	1.29	1.35	1	42.25	48.53	8.12	41.81	50.03
54	78.43	1.25	1.31	0.96	42.21	48.49	8.08	41.77	49.99	54
54										54
54										54	78.43±0.1	1.25±0.18	1.31±0.02	0.96±0.11	42.21±0.23	48.49±0.67	8.08±0.02	41.77±0.02	49.99±0
55	103.15	1.1	1.27	1.02	60.88	52.13	8.49	45.8	45.51	55	103.17	1.12	1.29	1.04	60.9	52.15	8.51	45.82	45.53
55	103.46	1.46	1.44	1.05	60.37	52.12	8.58	45.87	45.35	55	103.39	1.39	1.37	0.98	60.3	52.05	8.51	45.8	45.28
											103.35	1.32	1.4	1.08	60.67	52.17	8.57	45.88	45.47
55	103.31	1.28	1.36	1.04	60.63	52.13	8.53	45.84	45.43	55
55										55
55										55	103.31±0.22	1.28±0.25	1.36±0.12	1.04±0.02	60.63±0.36	52.13±0.01	8.53±0.06	45.84±0.05	45.43±0.11
56	133	1.44	1.47	1.2	60.75	53.17	8.51	45.08	46.17	56	133.02	1.46	1.49	1.22	60.77	53.19	8.53	45.1	46.19
56	133.64	1.6	1.45	1.23	60.55	53.09	8.51	45.23	46.01	56	133.57	1.53	1.38	1.16	60.48	53.02	8.44	45.16	45.94
											133.36	1.56	1.5	1.26	60.69	53.17	8.55	45.2	46.13
56	133.32	1.52	1.46	1.22	60.65	53.13	8.51	45.16	46.09	56
56										56
56										56	133.32±0.45	1.52±0.11	1.46±0.01	1.22±0.02	60.65±0.14	53.13±0.06	8.51±0	45.16±0.11	46.09±0.11
Total										Total	90.41±15.68	1.29±0.11	1.41±0.12	1.06±0.11	54.81±5.48	54.12±3.72	8.33±0.41	43.81±1.75	47.69±2.01

## Sheet: Sheet2
	百粒重(g)	横径(cm)	纵径(cm)	侧径（cm）	出仁率（%）	含油率（%）	饱和脂肪酸	单元不饱和脂肪酸	多元不饱和脂肪酸
	111.54	1.41	1.45	1.14	58.4	51.84	8.13	43.02	48.86
	108.35	1.22	1.58	1.08	63.71	54.49	8.43	47.64	43.79
	86.89	1.16	1.32	0.94	53.36	50.94	7.89	42.09	49.8
	89.56	1.39	1.56	1.04	56.27	52.6	7.96	42.21	49.67
	79.64	1.32	1.41	0.98	62.12	53.46	8.06	42.68	49.05
	88.41	1.38	1.51	1.2	56.6	49.1	8.25	42.34	49.21
	113.59	1.39	1.63	1.12	53.26	57.63	8.62	45.66	45.62
	72.14	1.24	1.29	1.12	56.29	51.86	7.83	41.72	50.29
	102.49	1.31	1.38	0.97	51.44	50.74	8.57	43.98	47.32
	66.38	1.22	1.38	0.88	53.54	55.23	7.44	41.81	50.66
	50.69	0.98	1.08	0.81	47.72	57.56	8.62	42.9	48.37
	72.25	1.25	1.24	1.04	50.4	56.88	8.61	47.72	43.59
	78.37	1.13	1.2	1	52.51	53.6	8.31	42.6	48.95
	96.37	1.26	1.37	1.08	52.92	57.72	8.57	44.14	47.04
	95.24	1.31	1.39	1.14	47.64	51.51	8.47	45.26	46.28
	84.8	1.23	1.4	0.96	56.44	57.3	7.89	43.02	48.99
	89.61	1.37	1.48	1.08	56.86	59.43	8.87	47.46	43.68
	101.71	1.4	1.54	1.09	56.21	59.19	8.5	46.67	44.7
	90.49	1.26	1.42	0.87	54.22	52.7	8.25	42.78	48.86
	70.28	1.13	1.23	0.94	51.8	56.72	7.79	42.11	49.92
	77.14	1.12	1.28	0.92	61.02	50.41	7.92	43.51	48.38
	107.25	1.4	1.59	1.07	52.24	53.67	7.87	41.45	50.42
	82.71	1.27	1.33	0.95	57.76	50.72	8.23	43.17	48.6
	85.59	1.38	1.3	1.16	50.23	54.54	8.43	47.42	43.51
	89.44	1.24	1.33	1	48.66	61.2	8.4	45.05	46.36
	80.24	1.14	1.31	1.07	46.42	57.53	8.17	43.51	48.22
	93.37	1.19	1.48	0.98	53.56	52.32	8.12	42.16	49.56
	97.46	1.37	1.5	1.1	51.26	49.3	8.23	43.52	48.14
	113.54	1.41	1.36	1.28	56.45	55.38	8.63	43.2	48.07
	73.27	1.2	1.42	1.12	57.37	54.31	8.37	43.47	47.91
	74.39	1.26	1.31	0.87	57.29	53.01	8.12	42.48	49.26
	89.66	1.22	1.34	1.08	51.65	65.25	8.5	45.58	45.8
	88.65	1.31	1.39	1.06	54.83	52.44	9.06	44.67	46.12
	91.25	1.24	1.53	1.23	62.83	55.58	8.39	44.3	47.05
	116.61	1.53	1.59	1.38	51.38	53.58	8.68	45.3	45.87
	87.61	1.18	1.34	1.02	50.95	59.52	8.06	44.4	47.42
	99.05	1.35	1.35	1.15	60.45	57.5	8.93	44.2	46.7
	66.66	1.22	1.37	1.06	56.5	54.67	8.4	40.66	50.8
	117.39	1.46	1.5	1.21	56.83	58.48	8.49	45.35	45.92
	109.37	1.38	1.47	1.13	48.52	47.27	9.54	45.22	45.04
	93.96	1.28	1.19	1.05	58.27	54.41	8.29	42.28	49.17
	80.65	1.22	1.43	1.1	50.33	56.51	7.61	42.76	49.43
	92.28	1.31	1.4	1.01	54.31	51.53	7.64	43.74	48.34
	77.35	1.23	1.51	1.02	62.24	49.93	8.33	40.64	50.87
	77.49	1.16	1.53	1.01	46.49	47.36	8.23	44.06	47.62
	91.34	1.35	1.46	1.14	52.49	51.73	8.29	42.85	48.7
	73.65	1.19	1.39	1.04	67.79	50.81	8.13	43.19	48.56
	107.49	1.39	1.39	1.16	56.51	55.64	8.42	47.47	43.94
	99.59	1.39	1.51	1.23	67.28	55.62	8.53	46.48	44.85
	79.41	1.18	1.32	1.04	47.62	48.58	8.19	45.4	46.21
	80.72	1.35	1.43	0.98	65.43	53.29	8.99	46.81	44.12
	88.54	1.4	1.39	1.05	47.6	49.54	7.95	42.35	49.54
	116.24	1.36	1.66	1.13	51.64	52.68	8.13	42.31	49.41
	78.43	1.25	1.31	0.96	42.21	48.49	8.08	41.77	49.99
	103.31	1.28	1.36	1.04	60.63	52.13	8.53	45.84	45.43
	133.32	1.52	1.46	1.22	60.65	53.13	8.51	45.16	46.09

## Sheet: Sheet3
		Morphological traits
	Number	Hundred-grain weight (g)	Transverse diameter (cm)	Longitudinal diameter (cm)	Lateral diameter (cm)	Kernel percentage (%)	Kernel oil content (%)	Saturated fatty acids (%)**	Monounsaturated fatty acids (%)**	Polyunsaturated fatty acids (%)**
	1	111.67	1.24	1.32	1.13	58.6	51.85	7.65	42.99	49.37
	1	111.36	1.43	1.38	1.11	58.1	51.81	8.46	43.03	48.51
	1	111.58	1.55	1.65	1.19	58.49	51.87	8.27	43.03	48.69
	2	108.52	1.28	1.38	1.08	63.53	54.03	8.44	47.52	43.86
	2	108.12	1.11	1.62	1.06	63.8	55.07	8.41	47.71	43.67
	2	108.4	1.26	1.73	1.1	63.81	54.37	8.45	47.68	43.85
	3	86.87	0.99	1.2	0.9	53.44	50.85	7.89	42.11	49.79
	3	86.85	1.12	1.39	0.92	53.24	50.97	7.89	42.04	49.76
	3	86.94	1.38	1.36	0.99	53.41	50.99	7.89	42.11	49.84
	4	89.66	1.38	1.61	1.06	56.49	52.71	7.98	42.39	49.35
	4	89.41	1.35	1.46	1	56.01	52.43	7.91	41.95	49.95
	4	89.61	1.43	1.6	1.05	56.32	52.66	8	42.28	49.7
	5	79.69	1.33	1.1	0.97	62.84	53.84	8.08	42.62	49.09
	5	79.54	1.28	1.59	0.94	61.14	52.75	8.02	42.66	49.01
	5	79.68	1.35	1.55	1.02	62.39	53.79	8.07	42.75	49.05
	6	88.58	1.39	1.56	1.28	56.98	49.03	8.24	42.35	49.21
	6	88.19	1.34	1.41	1.07	56.11	49.06	8.22	42.29	49.21
	6	88.47	1.4	1.56	1.24	56.71	49.2	8.29	42.37	49.21
	7	113.95	1.21	1.62	1.1	52.91	57.87	8.65	45.54	45.69
	7	113.1	1.47	1.59	1.08	53.55	57.24	8.59	45.67	45.57
	7	113.72	1.49	1.67	1.17	53.31	57.79	8.62	45.77	45.6
	8	71.74	1.11	1.15	0.98	56.49	51.83	7.85	41.88	50.01
	8	72.31	1.26	1.31	1.08	56.01	51.82	7.78	41.49	50.49
	8	72.36	1.34	1.41	1.31	56.36	51.92	7.86	41.78	50.34
	9	102.48	1.4	1.46	0.83	51	50.47	8.57	44.02	47.32
	9	102.5	1.21	1.25	0.99	51.89	50.83	8.53	43.9	47.3
	9	102.48	1.33	1.42	1.09	51.44	50.91	8.61	44.01	47.34
	10	66.47	1.21	1.36	0.86	53.97	55.01	7.44	41.83	50.59
	10	66.26	1.19	1.33	0.83	53.02	55.31	7.41	41.76	50.72
	10	66.42	1.25	1.44	0.94	53.62	55.38	7.47	41.83	50.68
	11	50.96	0.88	1.06	0.68	47.45	57.99	8.61	43.05	48.16
	11	50.36	0.98	1.04	0.82	47.94	56.89	8.58	42.7	48.56
	11	50.75	1.07	1.13	0.94	47.76	57.81	8.66	42.94	48.38
	12	72.01	1.09	1.25	1.01	50.51	56.81	8.59	47.72	43.67
	12	72.33	1.28	1.2	1.01	50.26	56.87	8.56	47.7	43.52
	12	72.4	1.38	1.26	1.11	50.42	56.96	8.67	47.73	43.58
	13	78.12	1.09	1.18	0.99	52.72	53.67	8.31	42.68	48.83
	13	78.58	1.1	1.13	0.97	52.23	53.48	8.31	42.47	48.98
	13	78.41	1.19	1.29	1.04	52.57	53.66	8.31	42.64	49.04
	14	96.04	1.07	1.08	1.02	52.57	57.95	8.59	44.14	47.04
	14	96.64	1.3	1.56	1.06	53.22	57.45	8.54	44.14	47
	14	96.4	1.4	1.48	1.17	52.96	57.76	8.57	44.14	47.08
	15	95.22	1.29	1.2	1	47.98	51.95	8.19	45.26	46.56
	15	95.19	1.27	1.53	1.16	47.25	51.04	8.67	45.26	46.08
	15	95.3	1.36	1.43	1.25	47.68	51.55	8.54	45.26	46.2
	16	84.64	1.01	1.41	0.88	56.58	57.55	7.93	42.88	49.1
	16	84.83	1.4	1.39	0.95	56.06	57.02	7.85	43.07	48.84
	16	84.92	1.27	1.41	1.04	56.67	57.33	7.88	43.12	49.02
	17	89.19	1.31	1.48	1.07	56.84	59.67	8.3	47.55	44.14
	17	89.88	1.35	1.43	1.04	56.82	59.14	9.35	47.35	43.29
	17	89.75	1.46	1.52	1.12	56.92	59.47	8.95	47.47	43.6
	18	101.89	1.31	1.55	1.08	56.15	58.94	8.55	46.53	44.74
	18	101.48	1.41	1.5	1.05	56.19	59.4	8.4	46.69	44.68
	18	101.75	1.48	1.56	1.13	56.28	59.23	8.54	46.78	44.67
	19	90.74	1.26	1.32	0.73	54.23	52.68	8.27	42.94	48.68
	19	90.16	1.27	1.42	0.89	54.17	52.65	8.2	42.58	48.99
	19	90.57	1.26	1.51	0.98	54.25	52.76	8.27	42.82	48.9
	20	70.02	0.98	1.22	0.76	52	56.53	7.79	42.1	49.95
	20	70.52	1.19	1.19	1.07	51.52	56.86	7.76	42.08	49.84
	20	70.32	1.22	1.27	0.98	51.88	56.76	7.81	42.15	49.96
	21	77	0.8	0.95	0.92	60.62	50.23	7.92	43.63	48.2
	21	77.16	1.38	1.58	0.9	61.36	50.54	7.91	43.35	48.5
	21	77.25	1.17	1.32	0.94	61.08	50.45	7.92	43.55	48.43
	22	107.19	1.26	1.58	1.06	52.81	53.7	7.88	41.56	50.32
	22	107.23	1.42	1.55	1.05	51.57	53.6	7.87	41.3	50.42
	22	107.32	1.52	1.63	1.1	52.35	53.7	7.87	41.49	50.53
	23	82.9	1.13	1.42	0.94	58.39	50.78	7.96	43.35	48.68
	23	82.49	1.29	1.21	0.91	57.07	50.62	8.58	42.94	48.47
	23	82.75	1.38	1.37	0.99	57.82	50.76	8.14	43.21	48.64
	24	86	1.12	1.31	1.16	49.98	54.79	7.88	47.42	43.25
	24	85.13	1.59	1.3	1.14	50.45	54.24	8.79	47.38	43.73
	24	85.63	1.42	1.3	1.17	50.27	54.58	8.61	47.46	43.56
	25	89.51	1	1.11	0.84	47.67	61.22	8.15	44.79	46.93
	25	89.34	1.32	1.5	1.03	49.33	61.18	8.65	45.29	45.73
	25	89.48	1.39	1.37	1.12	48.97	61.21	8.4	45.07	46.41
	26	79.9	1.06	1.23	0.97	46.87	57.54	8.17	43.51	48.22
	26	80.55	1.13	1.3	1.07	45.93	57.49	8.17	43.51	48.22
	26	80.28	1.22	1.39	1.17	46.46	57.55	8.17	43.5	48.21
	27	93.45	1.16	1.48	0.73	53.17	52.25	8.11	42.15	49.6
	27	93.24	1.16	1.46	1.18	53.9	52.3	8.09	42.12	49.49
	27	93.41	1.26	1.51	1.02	53.6	52.4	8.15	42.2	49.59
	28	96.94	1.41	1.43	1.09	51.57	49.54	8.25	43.52	48.14
	28	97.94	1.3	1.48	1.06	50.91	49.03	8.17	43.5	48.14
	28	97.5	1.4	1.59	1.14	51.3	49.34	8.27	43.54	48.14
	29	113.58	1.49	1.2	1.18	56.77	54.97	8.63	43.2	48.09
	29	113.45	1.28	1.39	1.28	56.07	55.77	8.62	43.21	48.03
	29	113.58	1.45	1.49	1.37	56.5	55.4	8.63	43.2	48.09
	30	73.27	1.18	1.45	1.12	57.7	54.3	8.15	43.01	48.43
	30	73.25	1.15	1.34	1.09	57	54.28	8.55	43.98	47.12
	30	73.29	1.26	1.46	1.14	57.41	54.35	8.4	43.41	48.17
	31	74.89	1.27	1.1	0.58	57.28	53.01	8.12	42.5	49.26
	31	73.85	1.23	1.37	0.98	57.25	53.01	8.12	42.42	49.23
	31	74.43	1.27	1.45	1.05	57.33	53.01	8.11	42.51	49.28
	32	89.89	1.12	1.35	1.08	51.88	65.51	8.5	45.59	45.81
	32	89.37	1.22	1.31	1.05	51.31	64.88	8.5	45.53	45.8
	32	89.72	1.31	1.35	1.1	51.75	65.35	8.5	45.61	45.8
	33	88.97	1.33	1.4	0.82	54.26	52.87	9.04	44.68	46.16
	33	88.28	1.24	1.36	1.16	55.35	51.97	9.01	44.67	46.04
	33	88.69	1.35	1.4	1.2	54.87	52.49	9.12	44.67	46.16
	34	90.92	1.28	1.54	1.23	62.51	55.66	8.38	44.2	47.16
	34	91.38	1.15	1.47	1.22	62.95	55.44	8.36	44.3	46.9
	34	91.44	1.28	1.57	1.23	63.02	55.63	8.42	44.39	47.09
	35	116.92	1.52	1.6	1.4	51.09	54	8.72	45.3	45.81
	35	116.25	1.49	1.59	1.33	51.64	53.1	8.6	45.3	45.85
	35	116.65	1.57	1.59	1.41	51.42	53.63	8.72	45.3	45.94
	36	87.92	1.04	1.34	0.96	52.21	58.89	8.15	44.7	47.02
	36	87.25	1.2	1.28	1	49.64	60.1	7.96	44.06	47.76
	36	87.65	1.29	1.39	1.09	50.99	59.56	8.07	44.43	47.47
	37	99.05	1.15	1.25	0.95	60.92	57.38	8.94	44.2	46.71
	37	99.05	1.5	1.35	1.29	59.94	57.51	8.9	44.17	46.7
	37	99.06	1.39	1.44	1.2	60.49	57.6	8.95	44.22	46.7
	38	66.26	1.14	1.38	1.05	55.81	54.67	8.4	40.65	50.8
	38	67	1.21	1.32	1.02	57.15	54.67	8.4	40.65	50.81
	38	66.71	1.3	1.41	1.1	56.54	54.68	8.4	40.66	50.8
	39	117.41	1.5	1.52	1.22	56.7	58.43	8.85	45.5	45.31
	39	117.37	1.39	1.44	1.16	56.85	58.45	8.1	45.15	46.45
	39	117.4	1.48	1.54	1.24	56.95	58.55	8.53	45.39	45.99
	40	109.46	1.27	1.56	1.13	48.16	47.31	9.55	45.06	45.19
	40	109.24	1.38	1.34	1.07	48.94	47.17	9.5	45.25	44.84
	40	109.41	1.48	1.52	1.18	48.47	47.32	9.56	45.34	45.08
	41	93.97	1.17	1.23	1.05	58.07	54.85	8.29	42.28	49.18
	41	93.96	1.28	1.11	1.05	58.41	53.93	8.26	42.25	49.17
	41	93.96	1.39	1.23	1.06	58.32	54.45	8.31	42.3	49.17
	42	80.98	1.1	1.59	0.99	50.11	56.52	7.62	42.75	49.43
	42	80.26	1.23	1.22	1.11	50.5	56.51	7.55	42.72	49.43
	42	80.7	1.32	1.48	1.2	50.37	56.51	7.65	42.8	49.44
	43	92.27	1.37	1.43	1.11	54.44	51.64	7.65	43.82	48.2
	43	92.25	1.2	1.33	0.88	54.13	51.38	7.61	43.62	48.36
	43	92.32	1.35	1.44	1.05	54.35	51.57	7.66	43.78	48.45
	44	77.54	1.23	1.43	1.01	62.52	49.81	8.33	40.77	50.68
	44	77.13	1.23	1.5	0.99	61.93	50	8.3	40.46	51.01
	44	77.39	1.24	1.59	1.06	62.28	49.99	8.35	40.68	50.91
	45	77.62	1.03	1.35	0.76	45.85	47.41	8.23	44.06	47.64
	45	77.31	1.17	1.66	1.21	47.07	47.26	8.2	44.03	47.55
	45	77.53	1.27	1.57	1.05	46.54	47.4	8.25	44.08	47.66
	46	90.97	1.39	1.48	1.17	51.83	51.91	8	42.86	48.9
	46	91.65	1.28	1.39	1.07	53.11	51.5	8.54	42.85	48.45
	46	91.39	1.37	1.5	1.17	52.53	51.77	8.33	42.85	48.74
	47	73.98	1.05	1.41	1.06	68.35	50.69	8.13	43.25	48.49
	47	73.26	1.21	1.33	0.99	67.2	50.82	8.09	43.09	48.6
	47	73.7	1.3	1.42	1.06	67.83	50.91	8.17	43.23	48.58
	48	107.47	1.39	1.43	1.19	56.85	55.63	8.94	47.65	43.19
	48	107.45	1.36	1.31	1.15	56.12	55.6	7.85	47.24	44.66
	48	107.54	1.41	1.42	1.15	56.55	55.68	8.48	47.51	43.98
	49	100.02	1.5	1.56	1.29	67.82	55.17	8.46	46.31	45.05
	49	99.13	1.25	1.45	1.14	66.71	56.02	8.63	46.52	44.6
	49	99.63	1.43	1.53	1.27	67.32	55.66	8.49	46.6	44.89
	50	79.17	1	1.33	1.05	47.22	48.22	8.19	45.38	46.21
	50	79.62	1.22	1.32	1.04	47.97	48.89	8.19	45.41	46.21
	50	79.45	1.31	1.32	1.04	47.66	48.62	8.2	45.41	46.2
	51	80.29	1.1	1.31	0.92	65.69	53.46	8.33	46.61	44.84
	51	80.91	1.55	1.44	0.96	65.11	53.07	9.6	46.97	43.42
	51	80.96	1.4	1.53	1.05	65.48	53.33	9.03	46.85	44.11
	52	88.67	1.25	1.4	0.87	47.98	49.13	7.96	42.36	49.48
	52	88.36	1.43	1.39	1.09	47	49.9	7.91	42.31	49.52
	52	88.58	1.52	1.39	1.18	47.81	49.58	7.97	42.37	49.61
	53	116.51	1.18	1.68	0.95	51.84	52.46	8.16	42.31	49.42
	53	115.92	1.4	1.59	1.18	51.39	52.85	8.07	42.32	49.41
	53	116.28	1.5	1.7	1.25	51.68	52.72	8.17	42.29	49.41
	54	78.5	1.05	1.32	0.84	41.96	49.13	8.09	41.79	49.99
	54	78.31	1.4	1.29	0.97	42.41	47.79	8.06	41.75	49.99
	54	78.47	1.29	1.32	1.06	42.25	48.54	8.09	41.78	49.99
	55	103.07	1.01	1.23	1.05	60.96	52.13	8.51	45.82	45.51
	55	103.5	1.5	1.38	1.01	60.25	52.12	8.49	45.8	45.3
	55	103.35	1.32	1.46	1.05	60.67	52.13	8.6	45.9	45.47
	56	132.85	1.4	1.46	1.22	60.77	53.16	8.51	45.05	46.17
	56	133.74	1.53	1.46	1.2	60.49	53.06	8.51	45.16	45.96
	56	133.36	1.62	1.45	1.23	60.69	53.16	8.51	45.26	46.13
